# Supplementary material
Source: PubMed Central journal article supplement (PMC4202907)
Supplement: Supp_Fig1.pdf [file Supp_Fig1.pdf]

## Supplementary Data

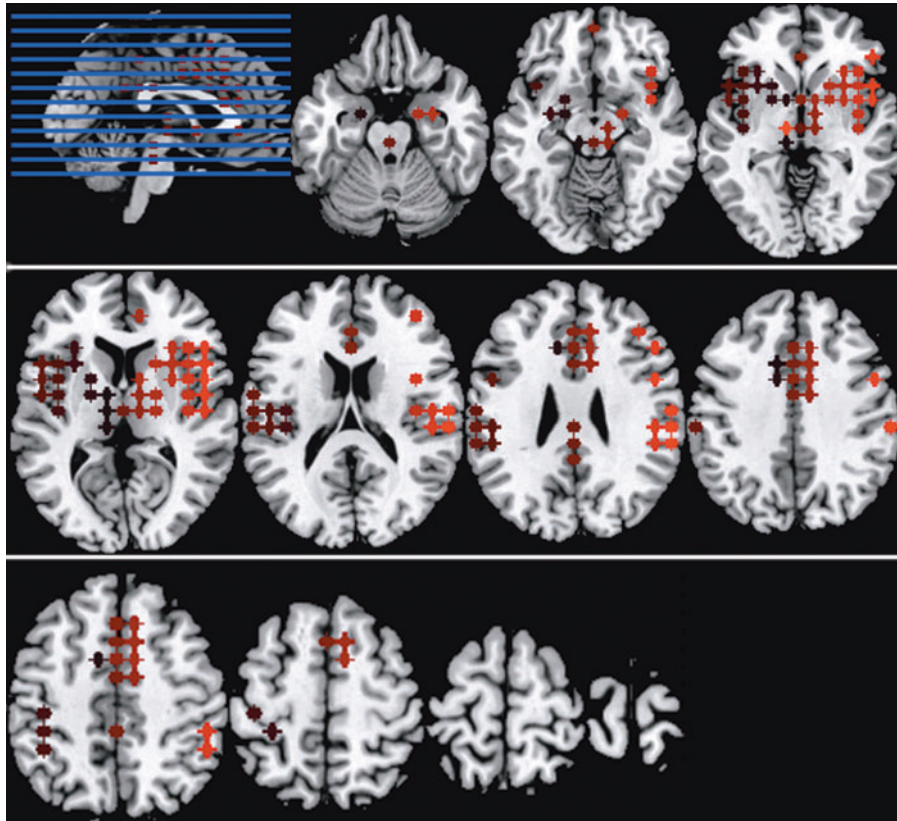

**SUPPLEMENTARY FIG. S1.** The figure displays the 159 seeds used in the seed correlation analysis, projected on an anatomical template brain that is provided in MNIcron.
