# Supplementary material
Source: PubMed Central journal article supplement (PMC4202907)
Supplement: Supp_Table1.pdf [file Supp_Table1.pdf]

SUPPLEMENTARY TABLE S1. THE TABLE SHOWS MNI COORDINATES AND ANATOMICAL LABELS OF THE 159 SEED REGIONS USED IN THE SEED CORRELATION ANALYSES

| x   | y   | z   | Region                                 |
|-----|-----|-----|----------------------------------------|
| -30 | -6  | -12 | Amygdala                               |
| -10 | 24  | 28  | Anterior cingulate cortex              |
| 0   | 14  | 28  | Anterior cingulate cortex              |
| 0   | 24  | 28  | Anterior cingulate cortex              |
| 0   | 34  | -2  | Anterior cingulate cortex              |
| 0   | 34  | 18  | Anterior cingulate cortex              |
| 0   | 34  | 28  | Anterior cingulate cortex              |
| 10  | 24  | 28  | Anterior cingulate cortex              |
| 10  | 34  | 28  | Anterior cingulate cortex              |
| 10  | 44  | 8   | Anterior cingulate cortex              |
| 0   | 24  | 18  | Anterior cingulate cortex <sup>a</sup> |
| 0   | -26 | -12 | Brain stem <sup>a</sup>                |
| 0   | -26 | -22 | Brain stem <sup>a</sup>                |
| 10  | -16 | -12 | Brainstem <sup>a</sup>                 |
| 10  | -26 | -12 | Brainstem <sup>a</sup>                 |
| 10  | 4   | 8   | Caudate <sup>a</sup>                   |
| 50  | 14  | 8   | Frontal inferior operculum             |
| 50  | 34  | -2  | Frontal inferior operculum             |
| 40  | 24  | 8   | Frontal inferior triangular            |
| 40  | 34  | 28  | Frontal inferior triangular            |
| 50  | 24  | 28  | Frontal inferior triangular            |
| 50  | 24  | 8   | Frontal inferior triangular            |
| 40  | 44  | 18  | Frontal middle                         |
| -40 | -16 | 8   | Heschl's area                          |
| 50  | -16 | 8   | Heschl's area                          |
| 50  | -6  | 8   | Heschl's area                          |
| -20 | -6  | -12 | Hippocampus                            |
| -20 | -6  | -22 | Hippocampus                            |
| 20  | -6  | -12 | Hippocampus                            |
| 30  | -6  | -22 | Hippocampus                            |
| -40 | 24  | -2  | Inferior frontal gyrus orbitalis       |
| -50 | 14  | 8   | Inferior frontal gyrus orbitalis       |
| 0   | 54  | -12 | Inferior frontal gyrus orbitalis       |
| 40  | 14  | 8   | Inferior frontal gyrus orbitalis       |
| 40  | 24  | -12 | Inferior frontal gyrus orbitalis       |
| -40 | -36 | 48  | Inferior parietal lobe                 |
| -40 | -46 | 48  | Inferior parietal lobe                 |
| 50  | -36 | 48  | Inferior parietal lobe                 |
| 50  | -46 | 48  | Inferior parietal lobe                 |
| -30 | 24  | -2  | Insula                                 |
| -30 | 24  | 8   | Insula                                 |
| -40 | -16 | -2  | Insula                                 |
| -40 | -6  | -2  | Insula                                 |
| -40 | -6  | 8   | Insula                                 |
| -40 | 14  | -12 | Insula                                 |
| -40 | 14  | -2  | Insula                                 |
| -40 | 14  | 8   | Insula                                 |
| -40 | 4   | -2  | Insula                                 |
| -40 | 4   | 8   | Insula                                 |
| 30  | 24  | -2  | Insula                                 |
| 30  | 24  | 8   | Insula                                 |
| 40  | -16 | -2  | Insula                                 |
| 40  | -16 | 8   | Insula                                 |
| 40  | -6  | -2  | Insula                                 |
| 40  | -6  | 8   | Insula                                 |
| 40  | 14  | -2  | Insula                                 |
| 40  | 24  | -2  | Insula                                 |
| 40  | 4   | -12 | Insula                                 |
| 40  | 4   | -2  | Insula                                 |
| 40  | 4   | 8   | Insula                                 |
| 50  | 4   | -2  | Insula                                 |

(continued)

SUPPLEMENTARY TABLE S1. (CONTINUED)

| x   | y   | z   | Region                          |
|-----|-----|-----|---------------------------------|
| -30 | 14  | 8   | Insula <sup>a</sup>             |
| 40  | 14  | -12 | Insula <sup>a</sup>             |
| -10 | 14  | 38  | Middle cingulate cortex         |
| -10 | 4   | 38  | Middle cingulate cortex         |
| 0   | -26 | 28  | Middle cingulate cortex         |
| 0   | -36 | 48  | Middle cingulate cortex         |
| 0   | -6  | 38  | Middle cingulate cortex         |
| 0   | -6  | 48  | Middle cingulate cortex         |
| 0   | 14  | 38  | Middle cingulate cortex         |
| 0   | 24  | 38  | Middle cingulate cortex         |
| 0   | 4   | 38  | Middle cingulate cortex         |
| 10  | -6  | 38  | Middle cingulate cortex         |
| 10  | 14  | 38  | Middle cingulate cortex         |
| 10  | 24  | 38  | Middle cingulate cortex         |
| 10  | 4   | 38  | Middle cingulate cortex         |
| -10 | 4   | -2  | Pallidum                        |
| -20 | 4   | -2  | Pallidum                        |
| 20  | 4   | -2  | Pallidum                        |
| 20  | -6  | -22 | ParaHippocampus                 |
| -30 | -36 | 58  | Postcentral                     |
| -40 | -26 | 48  | Postcentral                     |
| -40 | -26 | 58  | Postcentral                     |
| -50 | -16 | 18  | Postcentral                     |
| -60 | -16 | 18  | Postcentral                     |
| -60 | -16 | 28  | Postcentral                     |
| -60 | -6  | 18  | Postcentral                     |
| 0   | -36 | 28  | Posterior cingulate cortex      |
| 0   | -46 | 28  | Posterior cingulate cortex      |
| -50 | 4   | 28  | Precentral                      |
| 50  | 4   | 28  | Precentral                      |
| 50  | 4   | 38  | Precentral                      |
| -20 | 14  | -2  | Putamen                         |
| -20 | 4   | 8   | Putamen                         |
| 20  | 14  | -2  | Putamen                         |
| 20  | 14  | 8   | Putamen                         |
| 30  | 14  | -2  | Putamen                         |
| 30  | 14  | 8   | Putamen                         |
| 30  | 4   | -2  | Putamen                         |
| 30  | 4   | 8   | Putamen                         |
| -20 | 4   | -12 | Putamen <sup>a</sup>            |
| -30 | 14  | -2  | Putamen <sup>a</sup>            |
| -40 | -16 | 18  | Rolandic operculum              |
| -40 | -26 | 18  | Rolandic operculum              |
| -50 | -6  | 8   | Rolandic operculum              |
| -50 | 4   | 8   | Rolandic operculum              |
| 40  | -16 | 18  | Rolandic operculum              |
| 50  | -16 | 18  | Rolandic operculum              |
| 50  | 4   | 8   | Rolandic operculum              |
| 60  | -16 | 18  | Rolandic operculum              |
| 60  | 4   | 8   | Rolandic operculum              |
| 50  | 14  | -2  | Rolandic operculum <sup>a</sup> |
| -10 | 4   | 48  | Supplementary motor areas       |
| 0   | 14  | 48  | Supplementary motor areas       |
| 0   | 14  | 58  | Supplementary motor areas       |
| 0   | 24  | 48  | Supplementary motor areas       |
| 0   | 4   | 48  | Supplementary motor areas       |
| 10  | -6  | 48  | Supplementary motor areas       |
| 10  | 14  | 48  | Supplementary motor areas       |
| 10  | 14  | 58  | Supplementary motor areas       |
| 10  | 24  | 48  | Supplementary motor areas       |
| 10  | 4   | 48  | Supplementary motor areas       |
| 10  | 4   | 58  | Supplementary motor areas       |

(continued)

SUPPLEMENTARY TABLE S1. (CONTINUED)

| x   | y   | z   | Region                    |
|-----|-----|-----|---------------------------|
| -50 | -26 | 28  | Supramarginal gyrus       |
| -50 | -36 | 28  | Supramarginal gyrus       |
| -60 | -26 | 28  | Supramarginal gyrus       |
| -60 | -26 | 38  | Supramarginal gyrus       |
| -60 | -36 | 28  | Supramarginal gyrus       |
| 50  | -26 | 28  | Supramarginal gyrus       |
| 50  | -36 | 28  | Supramarginal gyrus       |
| 60  | -16 | 28  | Supramarginal gyrus gyrus |
| 60  | -26 | 28  | Supramarginal gyrus gyrus |
| 60  | -26 | 38  | Supramarginal Gyrus Gyrus |
| 60  | -36 | 28  | Supramarginal gyrus gyrus |
| -50 | -26 | 18  | Temporal superior         |
| -50 | 14  | -2  | Temporal superior         |
| -50 | 4   | -2  | Temporal superior         |
| -60 | -26 | 18  | Temporal superior         |
| 50  | -26 | 18  | Temporal superior         |
| 60  | -26 | 18  | Temporal superior gyrus   |
| -10 | -16 | -2  | Thalamus                  |
| -10 | -16 | 8   | Thalamus                  |
| -10 | -26 | -12 | Thalamus                  |
| -10 | -26 | -2  | Thalamus                  |
| -10 | -26 | 8   | Thalamus                  |
| -10 | -6  | 8   | Thalamus                  |
| 10  | -16 | 8   | Thalamus                  |
| 10  | -6  | 8   | Thalamus                  |
| 20  | -16 | 8   | Thalamus                  |
| 0   | -16 | 8   | Thalamus <sup>a</sup>     |
| 10  | -16 | -2  | Thalamus <sup>a</sup>     |
| -20 | -6  | 8   | White matter <sup>a</sup> |
| 0   | -16 | -2  | White matter <sup>a</sup> |
| 0   | 4   | -2  | White matter <sup>a</sup> |
| 10  | 4   | -2  | White matter <sup>a</sup> |
| 20  | -6  | 8   | White matter <sup>a</sup> |
| 40  | 4   | 18  | White matter <sup>a</sup> |
| 10  | -6  | -2  | White matter <sup>a</sup> |
| 10  | 14  | 28  | White matter <sup>a</sup> |

Anatomical labeling is performed using the AAL template in MRICron.

<sup>a</sup>Indicate absent AAL labels, in which case anatomical labeling was performed by using the Harvard-Oxford Cortical/Subcortical structural atlas or the Juelich Histological Atlas as provided by FSLview.

AAL, automatic anatomical labeling.
